# Supplementary material for: Canscora lucidissima, a Chinese folk medicine, exerts anti-inflammatory activities by inhibiting the phosphorylation of ERK1/2 in LPS-activated macrophages
Source: PubMed Central journal article supplement (PMC6916437; doi:10.1186/s12906-019-2783-2), 2019-12-16
Supplement: 12906_2019_2783_MOESM1_ESM.pdf [file 12906_2019_2783_MOESM1_ESM.pdf]

**Table S1** Raw data for figure 2.

a. Effect of CI-EE on the cell viability in LPS-activated RAW 264.7 cells.

| CI-EE ( $\mu\text{g/ml}$ ) | Mean    | SD     | P     |
|----------------------------|---------|--------|-------|
| -                          | 100.000 | 11.200 | -     |
| 25                         | 101.410 | 1.109  | 0.848 |
| 50                         | 106.536 | 2.076  | 0.419 |
| 100                        | 109.933 | 3.612  | 0.261 |
| 200                        | 111.471 | 0.872  | 0.217 |
| 400                        | 112.015 | 2.884  | 0.199 |

b. Effect of CI-EE on LPS-induced NO production in LPS-activated RAW 264.7 cells.

| LPS (ng/ml) | CI-EE ( $\mu\text{g/ml}$ ) | Mean   | SD    | P       |
|-------------|----------------------------|--------|-------|---------|
| 0           | 0                          | 3.838  | 0.085 | -       |
| 10          | 0                          | 25.262 | 0.642 | < 0.001 |
| 10          | 25                         | 21.103 | 0.296 | 0.003   |
| 10          | 50                         | 15.575 | 0.324 | < 0.001 |
| 10          | 100                        | 6.715  | 0.522 | < 0.001 |
