# Supplementary material for: Canscora lucidissima, a Chinese folk medicine, exerts anti-inflammatory activities by inhibiting the phosphorylation of ERK1/2 in LPS-activated macrophages
Source: PubMed Central journal article supplement (PMC6916437; doi:10.1186/s12906-019-2783-2), 2019-12-16
Supplement: 12906_2019_2783_MOESM4_ESM.pdf [file 12906_2019_2783_MOESM4_ESM.pdf]

**Table S4** Raw data for figure 5.

a. Effect of CI-EE on LPS-induced NF- $\kappa$ B luciferase action in LPS-activated RAW264.7 cells.

| LPS (ng/ml) | CI-EE ( $\mu$ g/ml) | Mean    | SD    | P       |
|-------------|---------------------|---------|-------|---------|
| 0           | 0                   | 1.000   | 0.145 | -       |
| 10          | 0                   | 105.642 | 3.008 | < 0.001 |
| 10          | 25                  | 121.691 | 6.468 | 0.057   |
| 10          | 50                  | 118.887 | 7.591 | 0.079   |
| 10          | 100                 | 106.695 | 2.484 | 0.665   |

b. Effects of CI-EE on cytosol I $\kappa$ B $\alpha$  in LPS-activated RAW264.7 cells.

| LPS (ng/ml) | CI-EE ( $\mu$ g/ml) | Mean  | SD    | P     |
|-------------|---------------------|-------|-------|-------|
| 0           | 0                   | 1.000 | 0.178 | -     |
| 10          | 0                   | 0.645 | 0.070 | 0.010 |
| 10          | 25                  | 0.660 | 0.050 | 0.703 |
| 10          | 50                  | 0.668 | 0.069 | 0.609 |
| 10          | 100                 | 0.571 | 0.014 | 0.063 |

c. Effects of CI-EE on cytosol p-I $\kappa$ B $\alpha$  in LPS-activated RAW264.7 cells.

| LPS (ng/ml) | CI-EE ( $\mu$ g/ml) | Mean  | SD    | P     |
|-------------|---------------------|-------|-------|-------|
| 0           | 0                   | 1.000 | 0.236 | -     |
| 10          | 0                   | 3.798 | 0.738 | 0.003 |
| 10          | 25                  | 4.071 | 0.210 | 0.571 |
| 10          | 50                  | 4.127 | 0.337 | 0.521 |
| 10          | 100                 | 3.699 | 0.452 | 0.853 |

d. Effects of CI-EE on the nuclear translocation of NF- $\kappa$ B p65 in LPS-activated RAW264.7 cells.

| LPS (ng/ml) | CI-EE ( $\mu$ g/ml) | Mean  | SD    | P       |
|-------------|---------------------|-------|-------|---------|
| 0           | 0                   | 1.000 | 0.037 | -       |
| 10          | 0                   | 2.758 | 0.093 | < 0.001 |
| 10          | 25                  | 2.883 | 0.124 | 0.558   |
| 10          | 50                  | 2.739 | 0.048 | 0.888   |
| 10          | 100                 | 2.879 | 0.046 | 0.409   |
