# Supplementary material for: Canscora lucidissima, a Chinese folk medicine, exerts anti-inflammatory activities by inhibiting the phosphorylation of ERK1/2 in LPS-activated macrophages
Source: PubMed Central journal article supplement (PMC6916437; doi:10.1186/s12906-019-2783-2), 2019-12-16
Supplement: 12906_2019_2783_MOESM6_ESM.pdf [file 12906_2019_2783_MOESM6_ESM.pdf]

**Table S6** Raw data for Figure 7.

a. Effects of CI-EE on TNF- $\alpha$  in the serum of LPS-induced endotoxemia mice.

| LPS (mg/kg) | CI-EE (mg/kg) | Mean  | SD    | P       |
|-------------|---------------|-------|-------|---------|
| 0           | 0             | 0.082 | 0.168 | -       |
| 1           | 0             | 2.992 | 1.235 | < 0.001 |
| 1           | 75            | 1.887 | 0.430 | 0.032   |
| 1           | 150           | 1.346 | 0.553 | 0.004   |
| 1           | 300           | 1.119 | 0.835 | 0.003   |

b. Effects of CI-EE on IL-6 in the serum of LPS-induced endotoxemia mice.

| LPS (mg/kg) | CI-EE (mg/kg) | Mean    | SD     | P       |
|-------------|---------------|---------|--------|---------|
| 0           | 0             | 3.313   | 5.641  | -       |
| 1           | 0             | 296.625 | 63.911 | < 0.001 |
| 1           | 75            | 279.750 | 57.933 | 0.589   |
| 1           | 150           | 229.938 | 52.044 | 0.038   |
| 1           | 300           | 180.393 | 70.594 | 0.005   |

c. Effects of CI-EE on MCP-1 in the serum of LPS-induced endotoxemia mice.

| LPS (mg/kg) | CI-EE (mg/kg) | Mean   | SD    | P       |
|-------------|---------------|--------|-------|---------|
| 0           | 0             | 1.335  | 0.117 | -       |
| 1           | 0             | 34.279 | 3.711 | < 0.001 |
| 1           | 75            | 25.860 | 5.450 | 0.003   |
| 1           | 150           | 24.310 | 1.303 | < 0.001 |
| 1           | 300           | 23.754 | 4.016 | < 0.001 |
